# Supplementary material for: Exploring the evolutionary origin of floral organs of Erycina pusilla, an emerging orchid model system
Source: PubMed Central journal article supplement (PMC5364718; doi:10.1186/s12862-017-0938-7), 2017-03-23

*Actin*

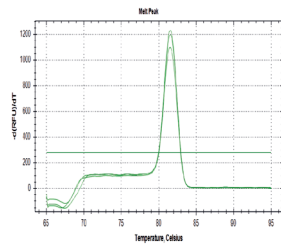

*Ubiquitin-2*

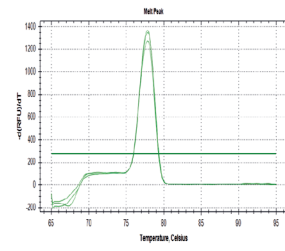

*Fbox*

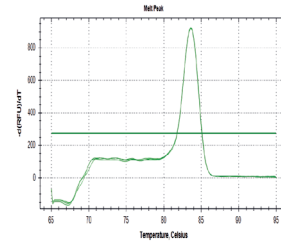

*EpMADS10 FUL*

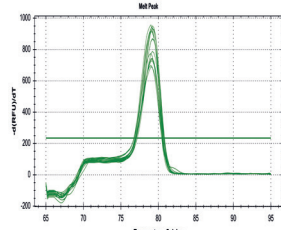

*EpMADS11 FUL*

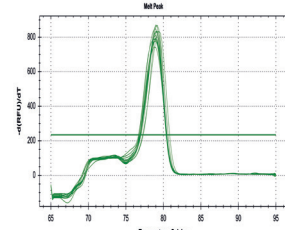

*EpMADS12 FUL*

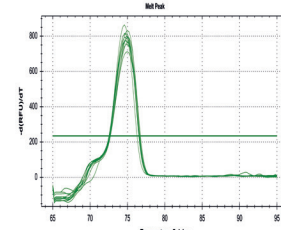

*EpMADS13 AP3*

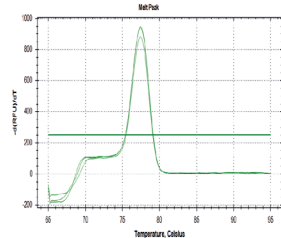

*EpMADS14 AP3*

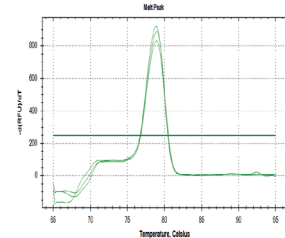

*EpMADS15 AP3*

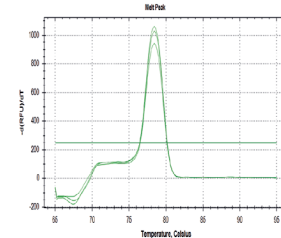

*EpMADS16 PI*

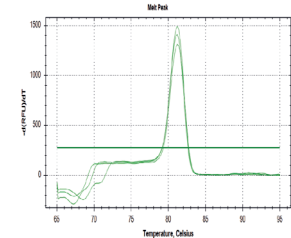

*EpMADS20 AG*

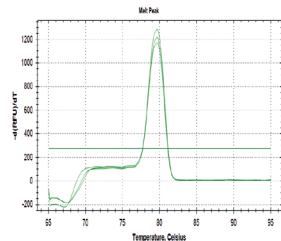

*EpMADS21 AG*

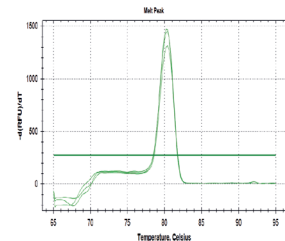

*EpMADS22 AG*

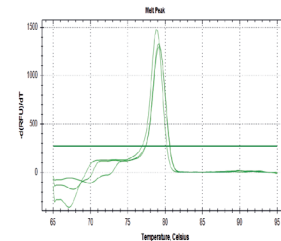

*EpMADS23 STK*

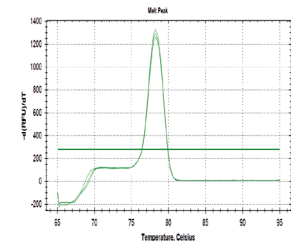

*EpMADS6 SEP*

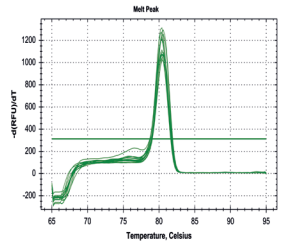

*EpMADS7 SEP*

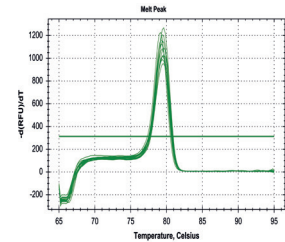

*EpMADS8 SEP*

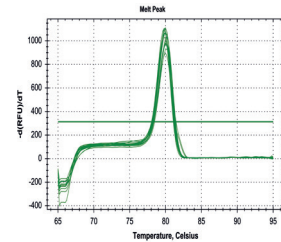

*EpMADS9 SEP*

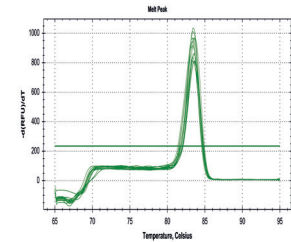

*EpMADS3 AGL6*

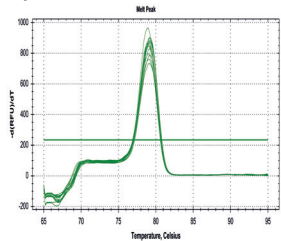

*EpMADS4 AGL6*

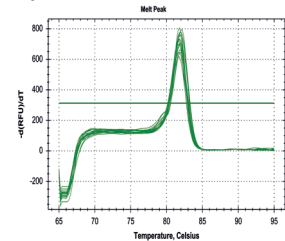

*EpMADS5 AGL6*

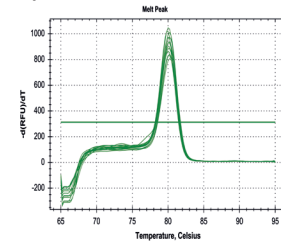

Supplement: 12862_2017_938_MOESM2_ESM.pdf [file 12862_2017_938_MOESM2_ESM.pdf]
