# Supplementary material for: Exploring the evolutionary origin of floral organs of Erycina pusilla, an emerging orchid model system
Source: PubMed Central journal article supplement (PMC5364718; doi:10.1186/s12862-017-0938-7), 2017-03-23

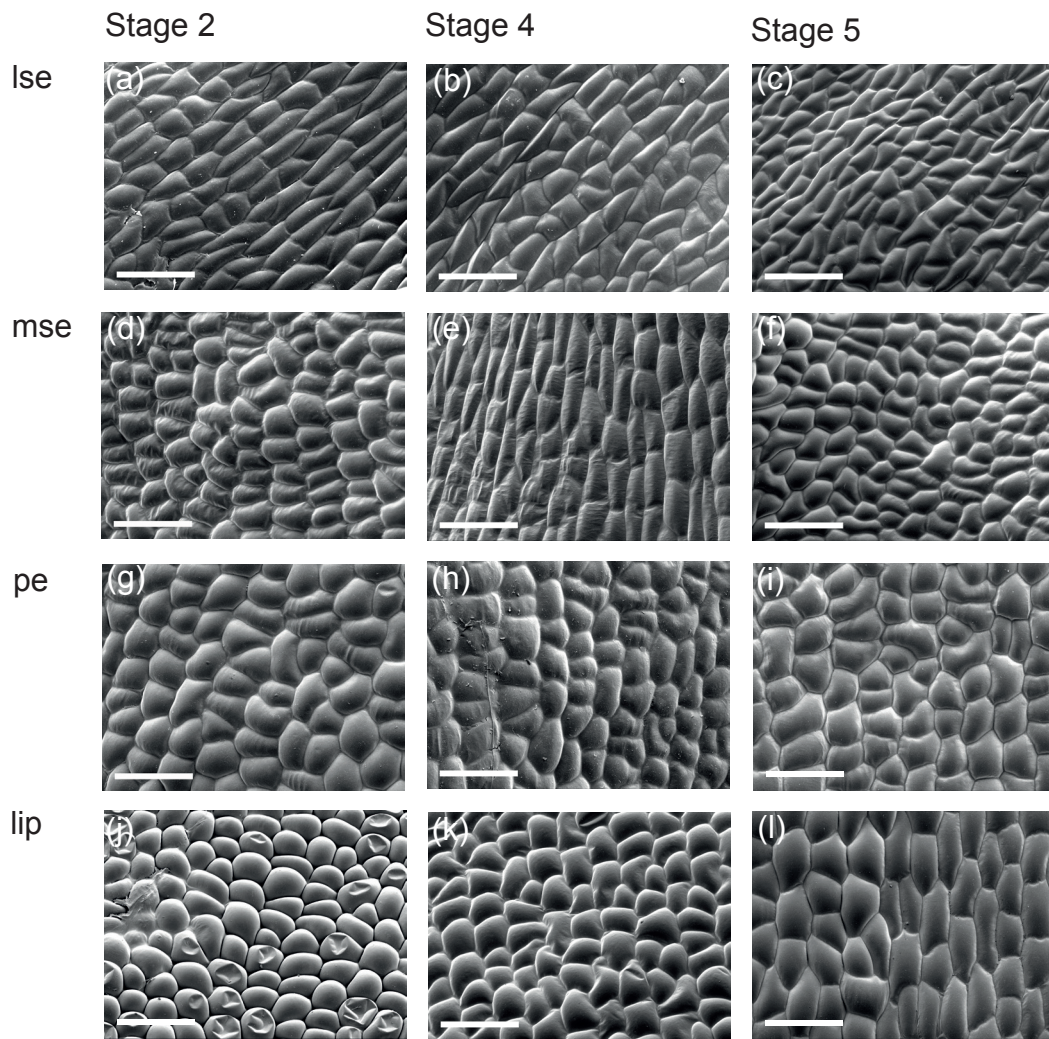

Supplement: 12862_2017_938_MOESM5_ESM.pdf [file 12862_2017_938_MOESM5_ESM.pdf]
